# Supplementary figures and images for: SRSF2 is a key player in orchestrating the directional migration and differentiation of MyoD progenitors during skeletal muscle development
Source: eLife journal article supplement (doi:10.7554/elife.98175), 2024-06-03

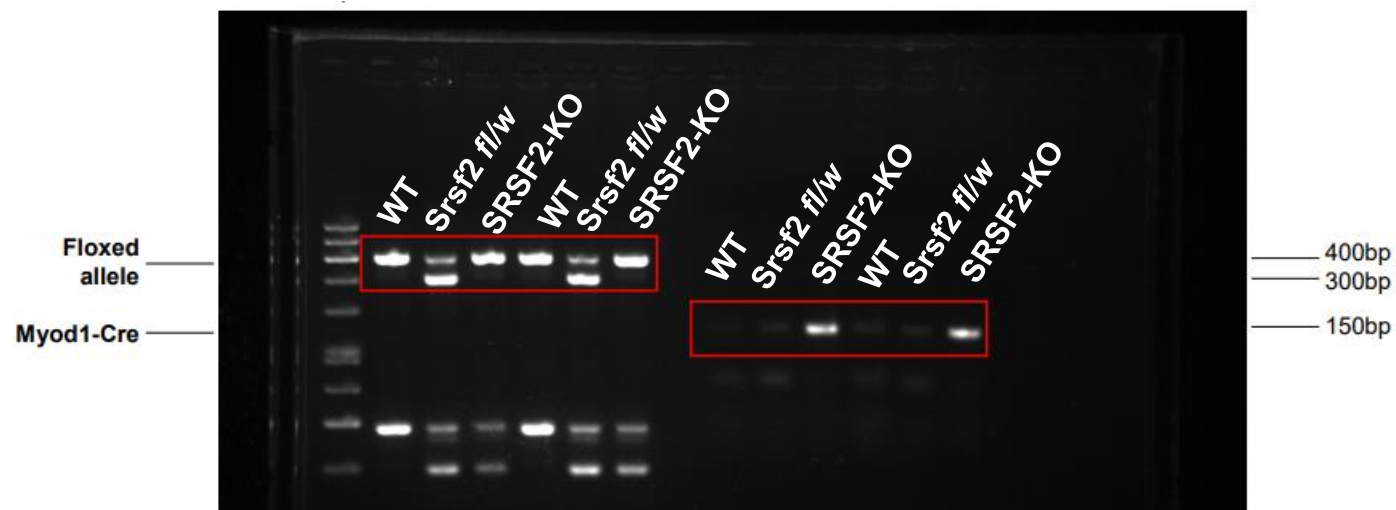

Figure 1— figure supplement 1

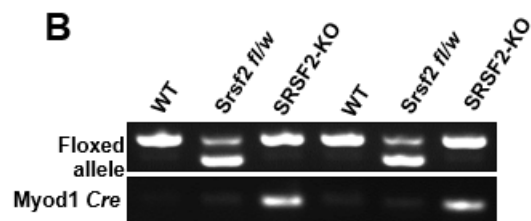

Supplement: fig1-figsupp1-data2 [file Figure1-supplement 1B.pdf › Fig.1-supplement 1B source data 2/Figure1-supplement 1B.pdf]

**Figure 7C**

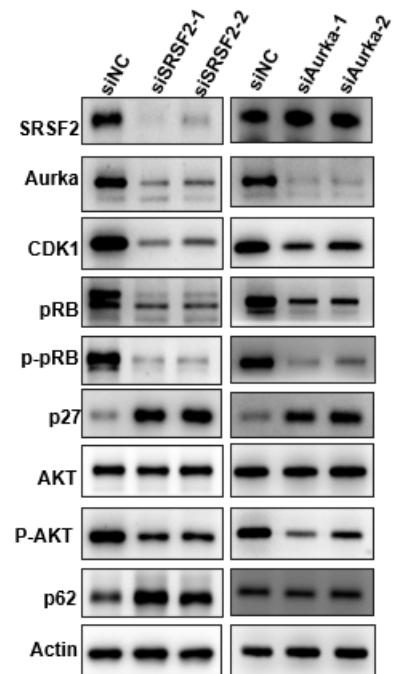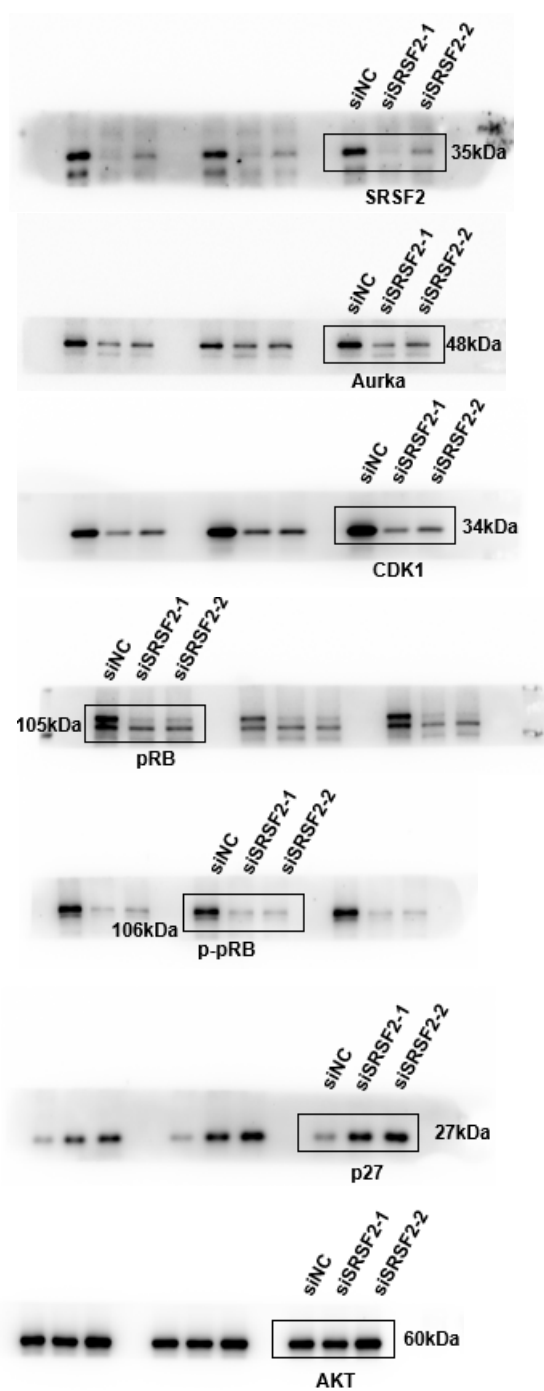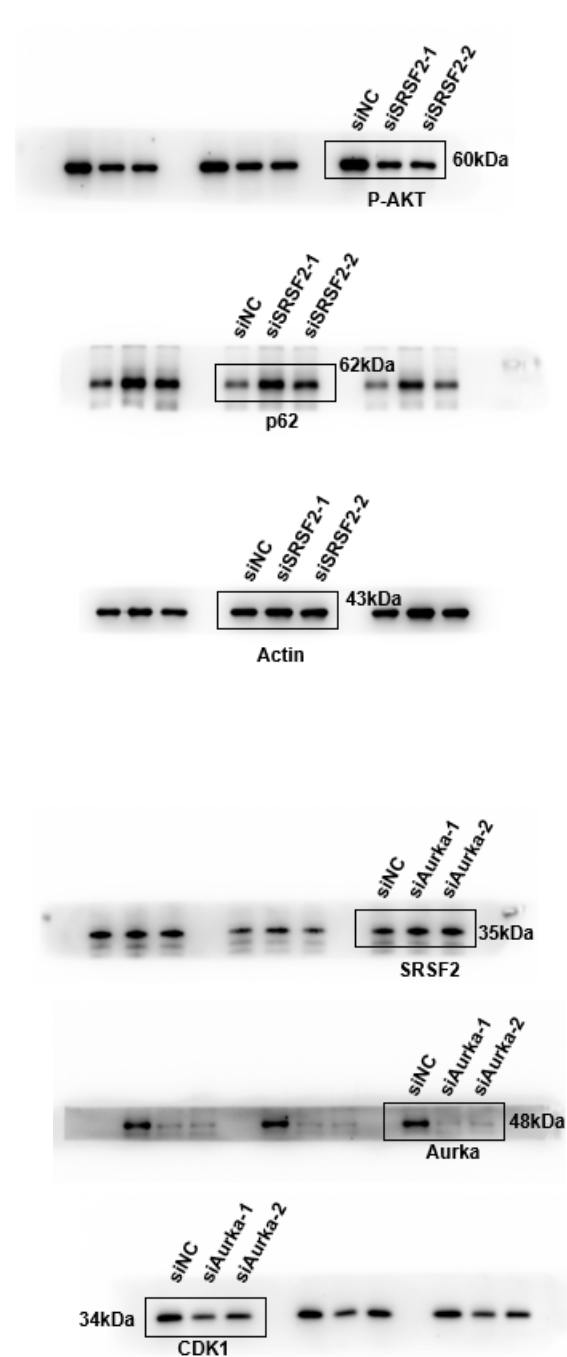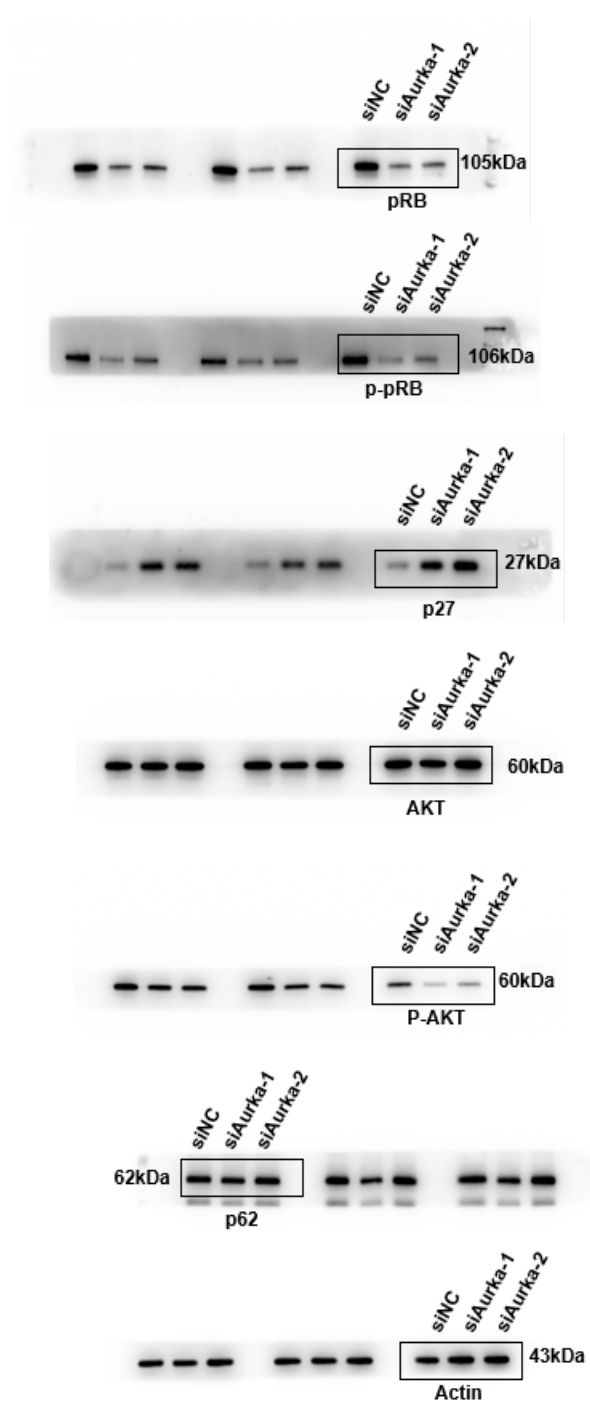

Supplement: fig7-data2 [file Figure 7C.pdf › Figure 7—source data 2/Figure 7C.pdf]

Figure 7H

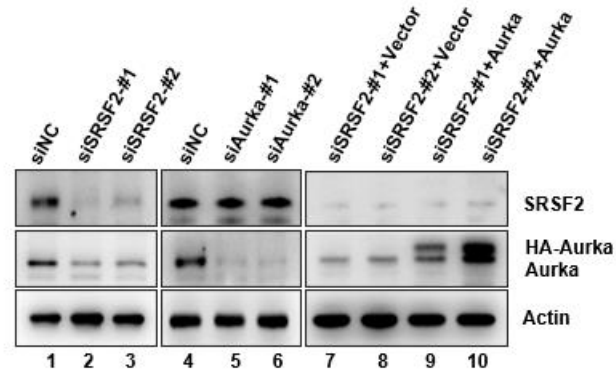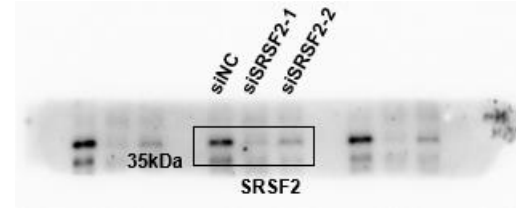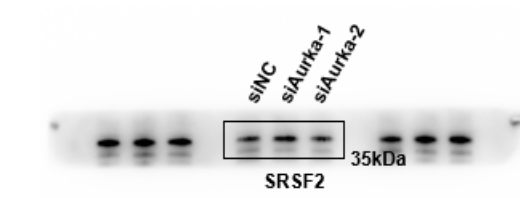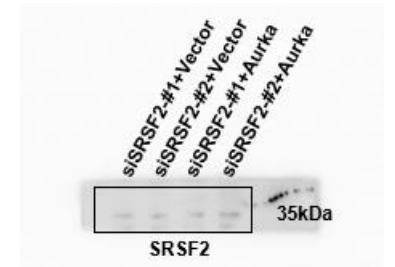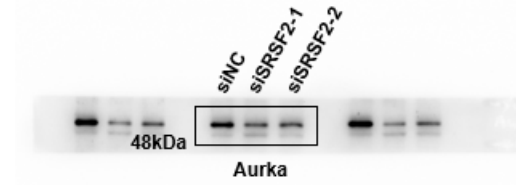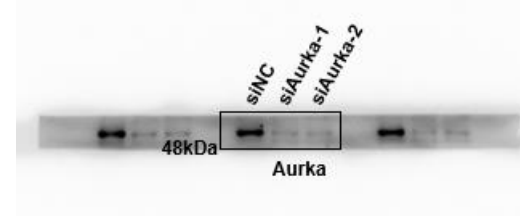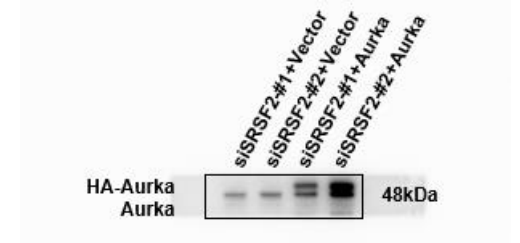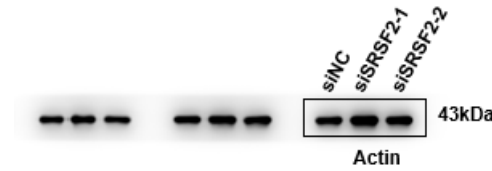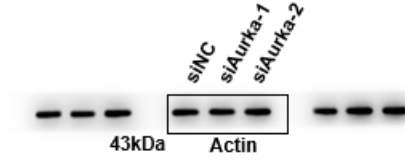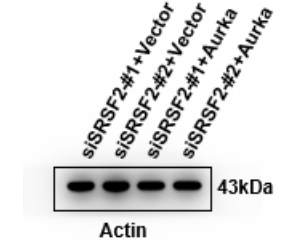

Supplement: fig7-data4 [file Figure 7H.pdf › Figure 7—source data 4/Figure 7H.pdf]

**Figure 8G**

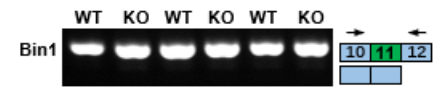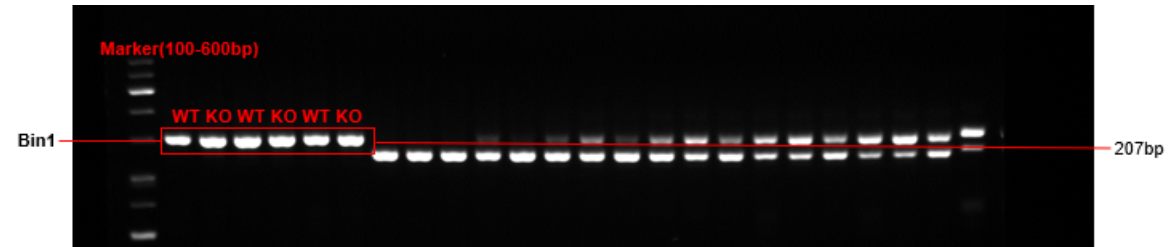

Supplement: fig8-data10 [file Figure 8G.pdf › Figure 8—source data 10/Figure 8G.pdf]

Figure 8H

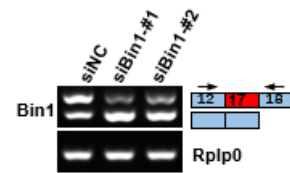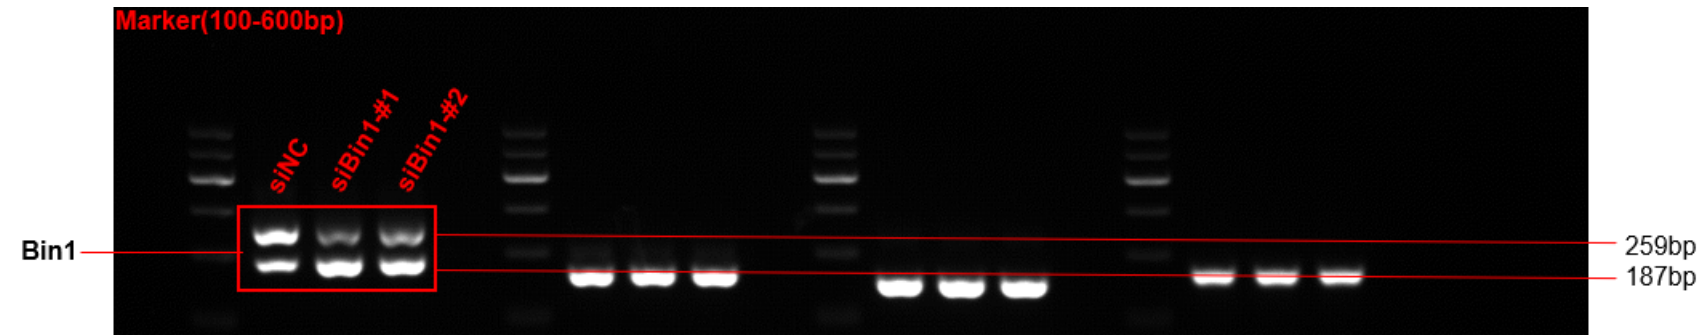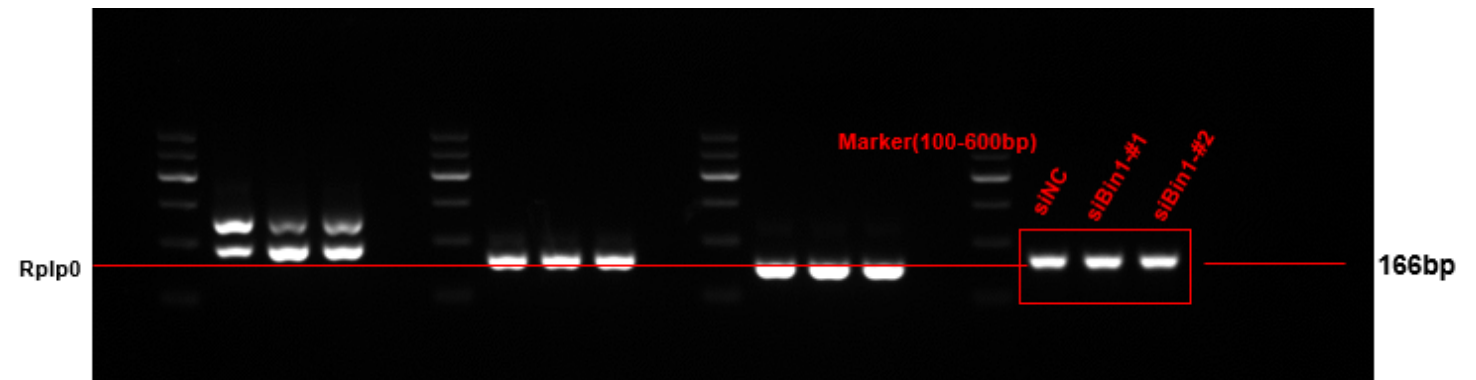

Supplement: fig8-data12 [file Figure 8H.pdf › Figure 8—source data 12/Figure 8H.pdf]

Figure 8B

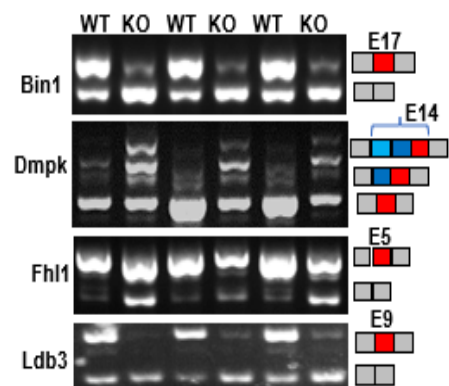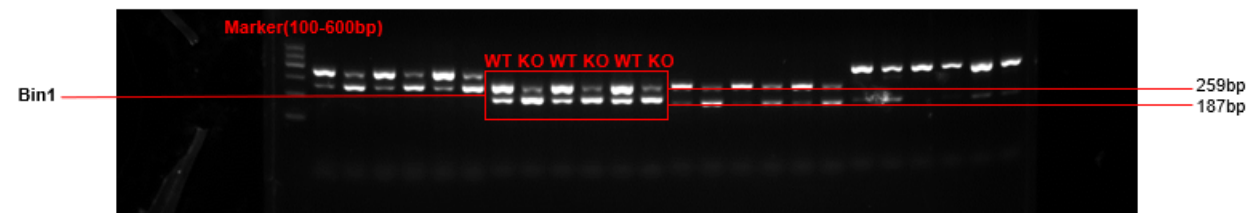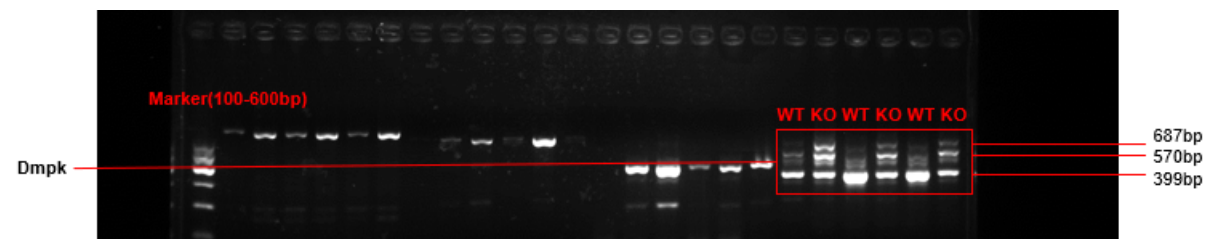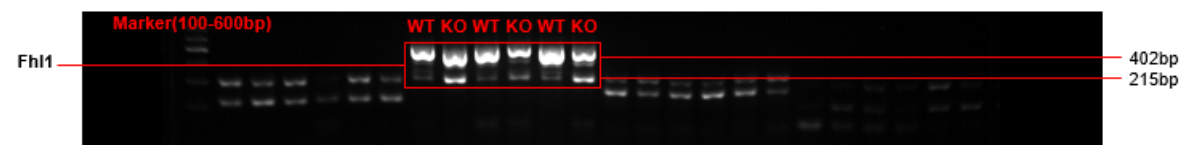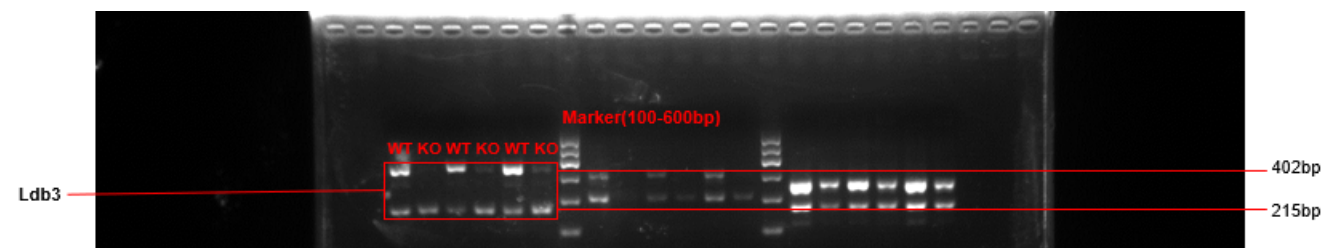

Supplement: fig8-data2 [file Figure 8B.pdf › Figure 8—source data 2/Figure 8B.pdf]

Figure 8C

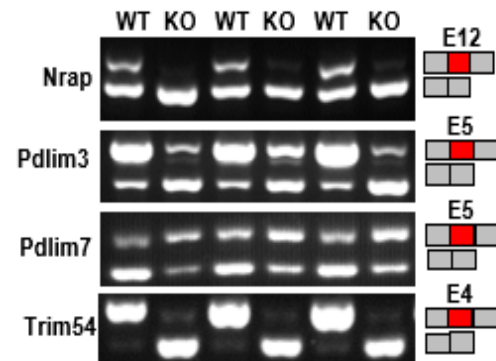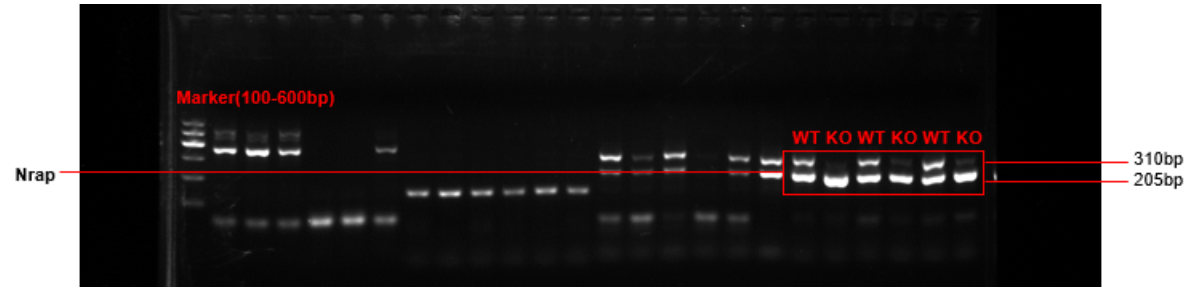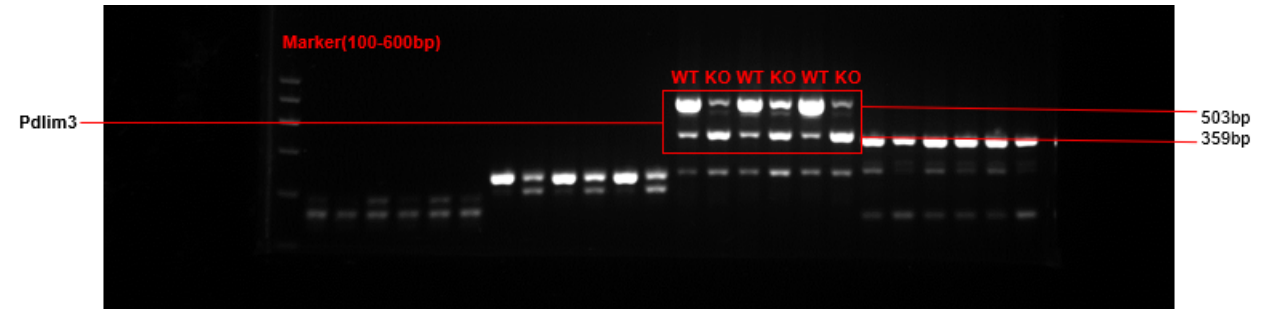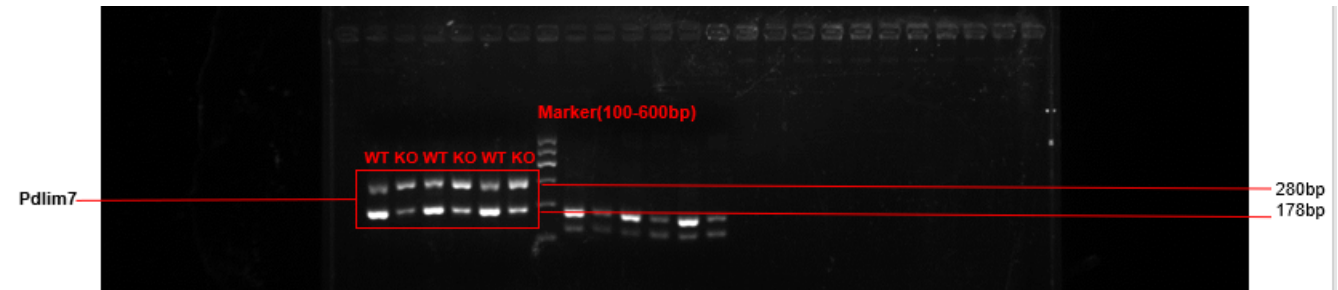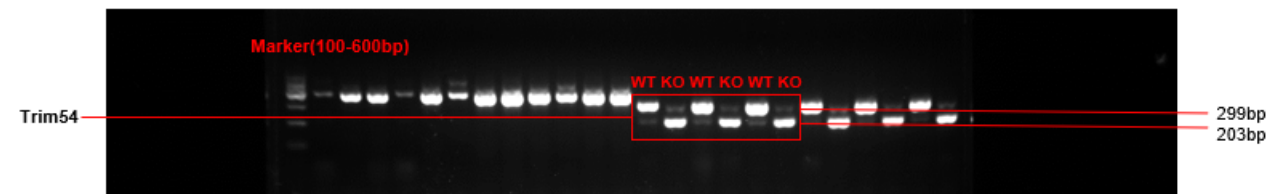

Supplement: fig8-data4 [file Figure 8C.pdf › Figure 8—source data 4/Figure 8C.pdf]

Figure 8D

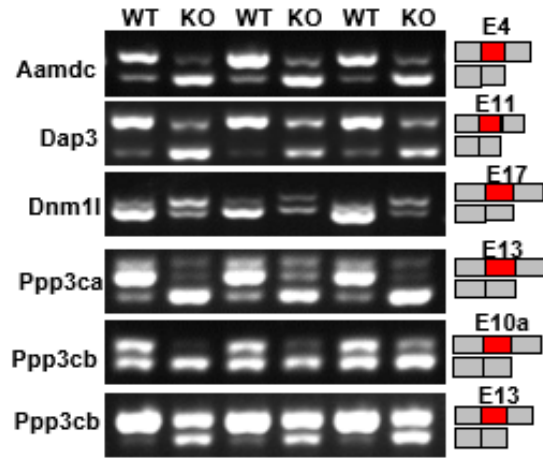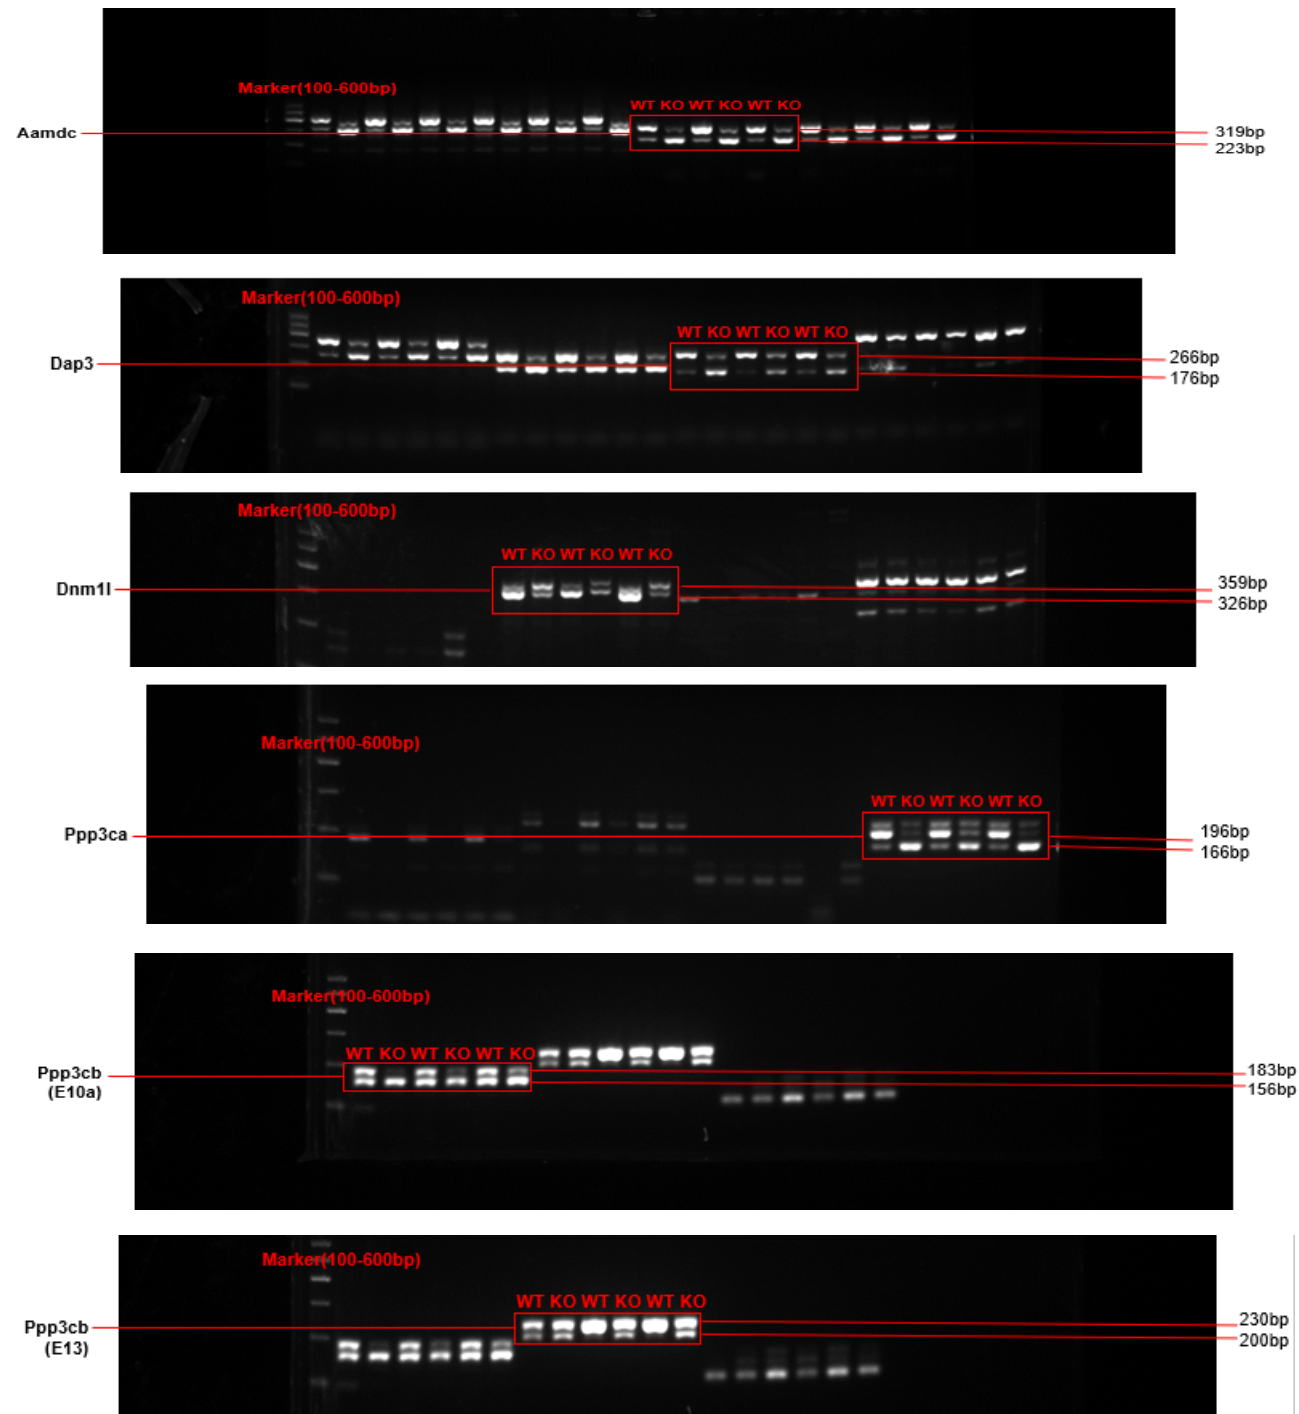

Supplement: fig8-data6 [file Figure 8D.pdf › Figure 8—source data 6/Figure 8D.pdf]

**Figure 8E**

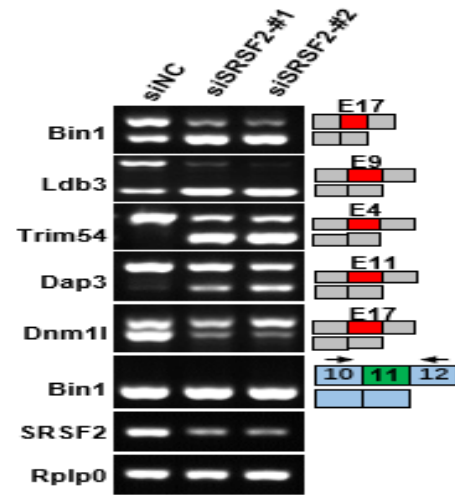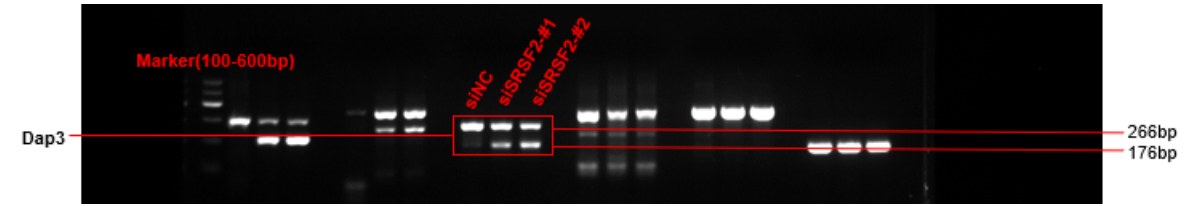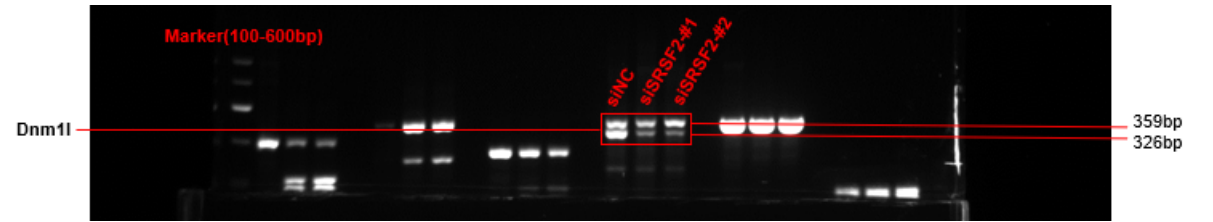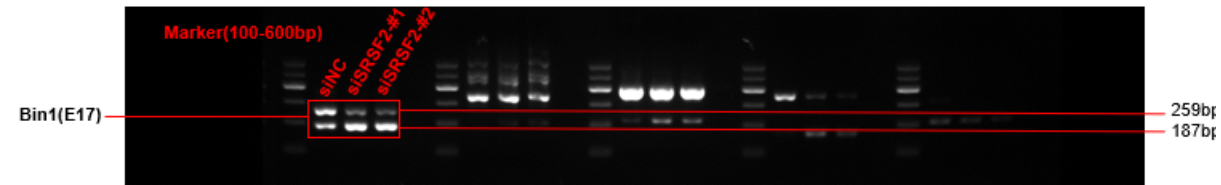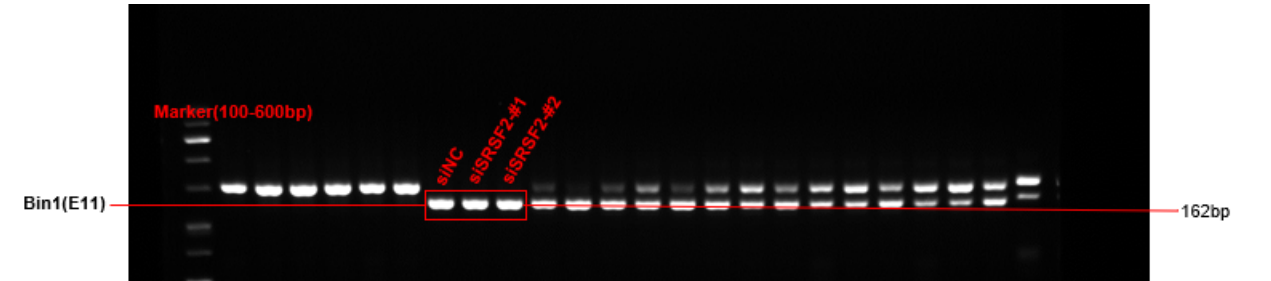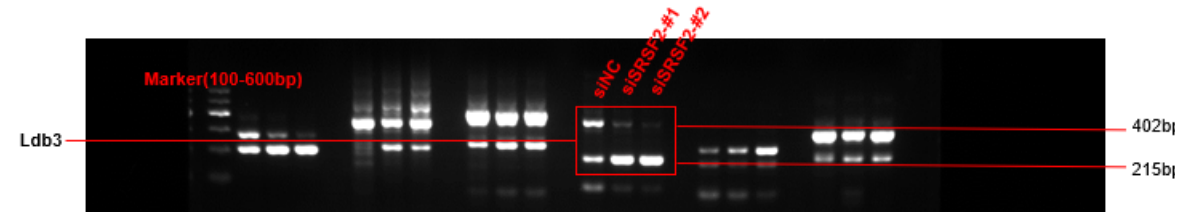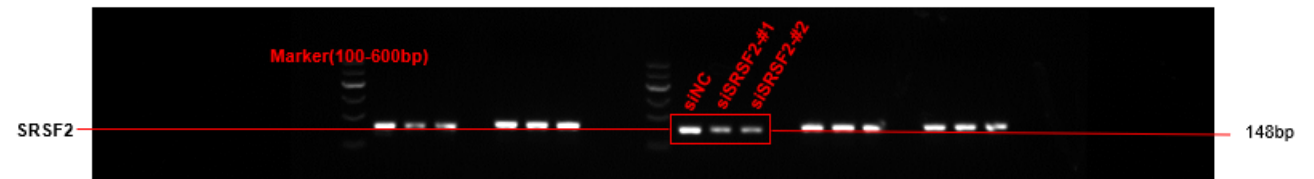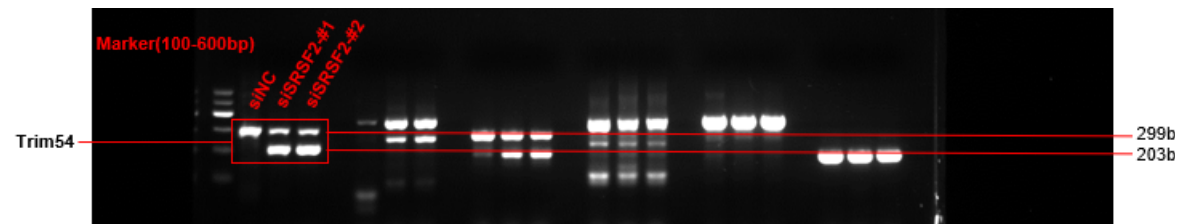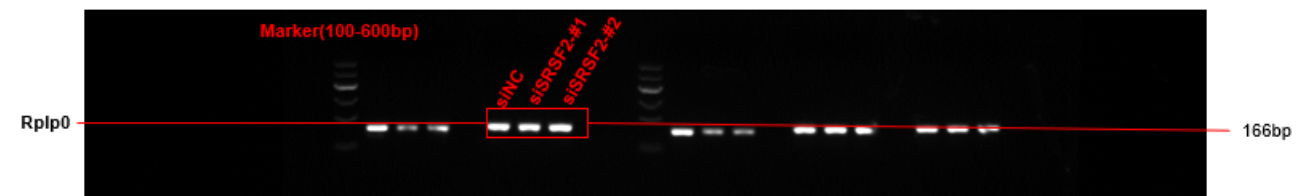

Supplement: fig8-data8 [file Figure 8E.pdf › Figure 8—source data 8/Figure 8E.pdf]
